# Supplementary material for: Association between use of antihypertensive drugs and the risk of cancer: a population-based cohort study in Shanghai
Source: PubMed Central journal article supplement (PMC10173582; doi:10.1186/s12885-023-10849-8), 2023-05-11
Supplement: 12885_2023_10849_MOESM2_ESM.pdf [file 12885_2023_10849_MOESM2_ESM.pdf]

**SBP<130 mmHg**

**SBP≥130 mmHg**

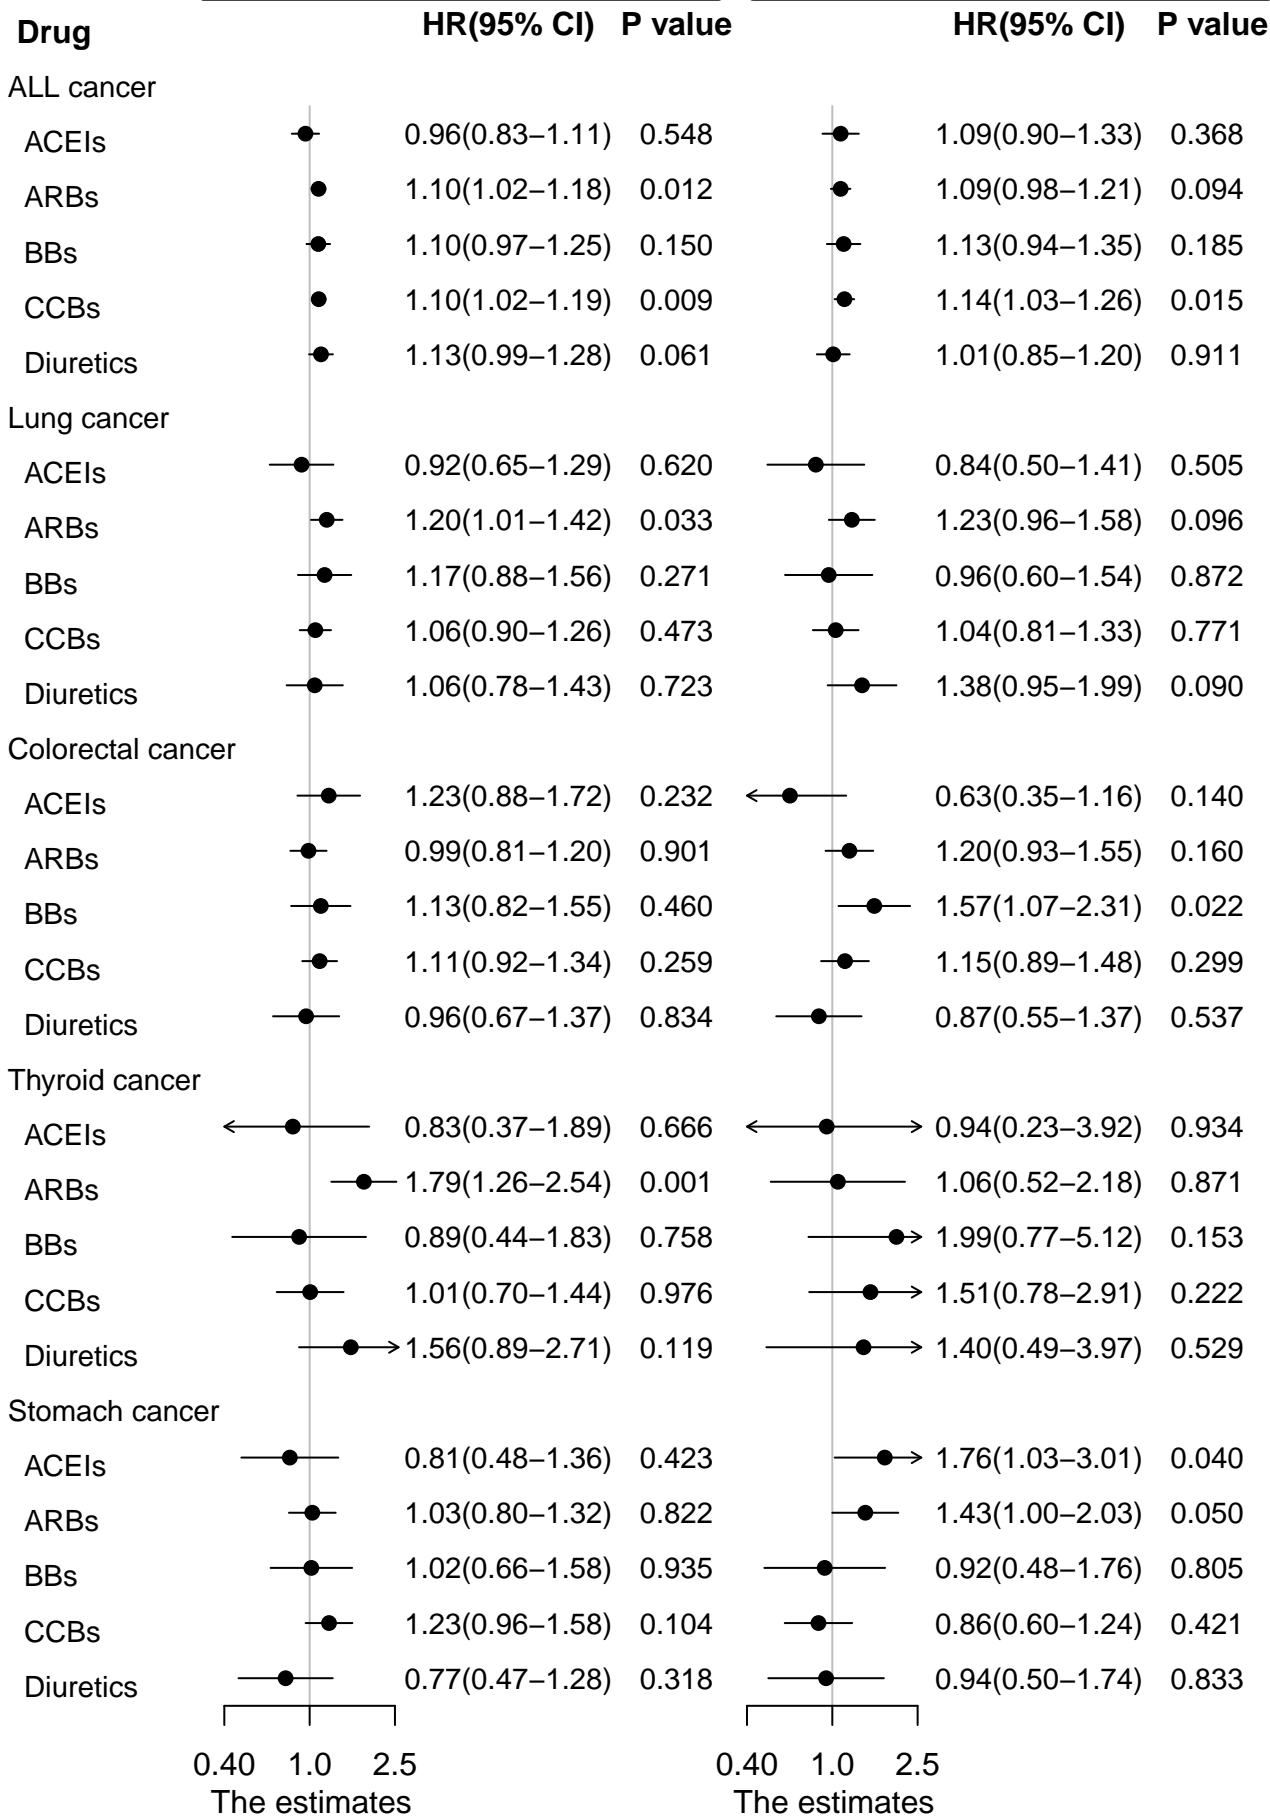

0.40 1.0 2.5

The estimates

0.40 1.0 2.5

The estimates
